# Supplementary material for: Photophysical properties of Kuratowski-type coordination compounds [MIIZn4Cl4(Me2bta)6] (MII = Zn or Ru) featuring long-lived excited electronic states
Source: Royal Society of Chemistry journal article supplement (doi:10.1039/c0dt01750g), 2011-01-01
Supplement: c0dt01750g.pdf [file c0dt01750g.pdf]

## Photophysical Properties of Kuratowski-Type Coordination Compounds [M<sup>II</sup>Zn<sub>4</sub>Cl<sub>4</sub>(Me<sub>2</sub>bta)<sub>6</sub>] (M<sup>II</sup> = Zn or Ru) Featuring Long-Lived Excited Electronic States

Ying-Ya Liu,<sup>a</sup> Maciej Grzywa,<sup>a</sup> Markus Tonigold,<sup>a</sup> German Sastre,<sup>\*,b</sup> Tanja Schüttrigkeit,<sup>c</sup>  
Nicholas S. Leeson,<sup>d</sup> and Dirk Volkmer<sup>\*,a,e</sup>

<sup>a</sup> *Ulm University, Institute of Inorganic Chemistry II - Materials and Catalysis, Albert-Einstein-Allee 11, D-89081 Ulm, Germany.*

<sup>b</sup> *Instituto de Tecnologia Química (UPV-CSIC), Universidad Politécnica de Valencia, Av. Los Naranjos s/n, 46022 Valencia, Spain*

<sup>c</sup> *Hamamatsu Photonics Deutschland GmbH, Arzbergerstraße 10, D-82211 Herrsching, Germany*

<sup>d</sup> *Edinburgh Instruments Ltd, 2 Bain Square, Kirkton Campus, Livingston, EH54 7DQ, UK.*

<sup>e</sup> *Augsburg University, Institute of Physics, Chair of Solid State and Material Science, Universitätsstr. 1, D-86159 Augsburg, Germany.*

*Fax: +49 (821) 598-5955; Tel: +49 (821) 598-3006; E-mail: dirk.volkmer@physik.uni-augsburg.de*

### Contents

**Fig. S1.** <sup>1</sup>H-NMR of **2** in toluene-d<sup>8</sup>.

**Fig. S2.** Optical and scanning electron micrographs of compound **1**.

**Fig. S3.** Comparison of XRPD patterns of compound **1** (synthesized by two different methods) with a simulated XRPD pattern, as calculated from single crystal X-ray data.

**Fig. S4. (a)** LIFDI mass spectrum of compound **1** (taken from an ethyl acetate solution) (Top: m/z 50-1600, bottom: m/z 1300-1500).

**Fig. S4. (b)** LIFDI mass spectrum of compound **1** (taken from an ethyl acetate solution). Top: observed, bottom: calculated mass spectrum.

**Fig. S5 (a).** LIFDI mass spectrum of compound **2** (taken from an ethyl acetate solution). (Top: m/z 50-1600, bottom: m/z 1250-1450).

**Fig. S5. (b)** LIFDI mass spectrum of compound **2** (taken from an ethyl acetate solution). Top: observed, bottom: calculated mass spectrum.

**Fig. S6.** Optical and scanning electron micrographs of compound **3**.

**Fig. S7.** Comparison of the experimentally observed XRPD pattern of compound **3** with a simulated XRPD pattern, as calculated from single crystal X-ray data.

**Fig. S8.** FT-IR spectrum of Zn<sub>5</sub>Cl<sub>4</sub>(ta)<sub>6</sub> (**3**).

**Fig. S9.** Raman spectrum of Zn<sub>5</sub>Cl<sub>4</sub>(ta)<sub>6</sub> (**3**).

**Fig. S10.** UV-Vis spectra of btaH (1H-1,2,3-benzotriazole) as calculated by different methods: TDDFT (functionals and basis sets as specified) and ZINDO.

**Fig. S11.** Main components of the two bands in the UV-Vis spectrum of compound **1**, [RuZn<sub>4</sub>Cl<sub>4</sub>(Me<sub>2</sub>bta)<sub>6</sub>] (cf. Fig. 11 in the manuscript). 'f' is the oscillator strength. The band at 393-396 nm is of MLCT type, whereas the band at 287 nm is a LLCT.

**Fig. S12.** Main components of the two bands in the UV-Vis spectrum of compound **3**,  $[\text{Zn}_5\text{Cl}_4(\text{ta})_6]$  (cf. Fig. 11 in the manuscript). 'f' is the oscillator strength. The bands at 284 and 233 nm are of LLCT type.

**Fig. S13.** Main components of the two bands in the UV-Vis spectrum of **3-Ru**,  $[\text{RuZn}_4\text{Cl}_4(\text{ta})_6]$  (cf. Fig. 11 in the manuscript). 'f' is the oscillator strength. The bands at 357 and 328 nm are of d-d and MLCT type whereas the band at 276 nm is a LLCT involving the  $\text{Cl}^-$  ligands.

**Table S1.** UV/Vis and steady-state fluorescence spectroscopic data of the three compounds.

**Fig. S14.** DFT (HCTH-TZVPP) calculated infrared spectrum of (**3**). Compare to **Fig. S8**. The main features are: 815 (CH out of plane), 978 (ta skeleton, CCN bending), 1138 (HCN bending), 1222 (ZnN asym. stretching), 1448 (CN stretching or HCN bending), 1485 (C=C stretching) and 3245 (CH stretching).

**Fig. S15.** DFT (HCTH-TZVPP) calculated Raman spectrum of (**3**), which gives as main active bands: 1011 (HCN bending), 1226 (ZnN stretching), 1281 (CN stretching), 1486 (CC stretching) and 3263 (CH stretching). Compare to **Fig. S9**.

**Fig. S16.** Comparative features of DFT (HCTH-TZVPP) calculated infrared spectra of compounds **1**, **3** and **3-Ru**.

**Fig. S17.** Comparative features of DFT (HCTH-TZVPP) calculated infrared spectra of compounds **3** and **3-Ru**.

**Table S2.** Active normal vibrational modes in the infrared spectra of compounds **3** and **3-Ru**, as calculated from DFT (HCTH-TZVPP). See **Figs. S16** and **S17**.

**Fig. S18.** Fluorescence excitation spectra of  $\text{Me}_2\text{btaH}$  in acetonitrile solution (—) and acetonitrile reference (⋯).

**Fig. S19.** Raman signals swamping the emission spectra of compound **1** (light blue,  $\lambda_{\text{EXC.}}=284\text{nm}$ , dark blue,  $\lambda_{\text{EXC.}}=280\text{nm}$ ).

**Fig. S20.** TRES (Time Resolved Emission Spectrum) of **1**,  $\lambda_{\text{EXC.}} = 273\text{nm}$ .

**Fig. S21.** Steady-state emission ( $\blacktriangle$ ,  $\lambda_{\text{EXC.}}=250\text{ nm}$ ) and quasi-steady-state ( $\triangle$ ,  $\lambda_{\text{EXC.}}=273\text{ nm}$ ) spectra of compound **1**.

**Fig. S22.** Steady-state spectra of acetonitrile ( $\lambda_{\text{EXC.}}=335\text{ nm}$ , ⋯), **1** in acetonitrile, ( $\lambda_{\text{EXC.}}=330$ , ----), **1** in acetonitrile ( $\lambda_{\text{EXC.}}=330\text{ nm}$ , —).

**Fig. S23.** Kinetic scan of **1** (black), **2** (light grey) and  $\text{Me}_2\text{btaH}$  (dark grey).

**Fig. S24.** Fluorescence decays of  $\text{Me}_2\text{btaH}$  (top), **1** (middle) and **2** (bottom) before ( $\square$ ) and after ( $\triangle$ ) photobleaching. IRF (—), Fit (—),  $\lambda_{\text{EXC.}}=280\text{nm}$ .

**Table S3.** Experimental conditions of steady-state and lifetime measurements of **1**.

**Table S4.** Experimental conditions of steady state and lifetime measurements of **2**.

**Table S5.** Experimental conditions of all steady state measurements of  $\text{Me}_2\text{btaH}$ .

Ru-4f/LiuPROTON Tol /opt/topspin alkvollmer 14

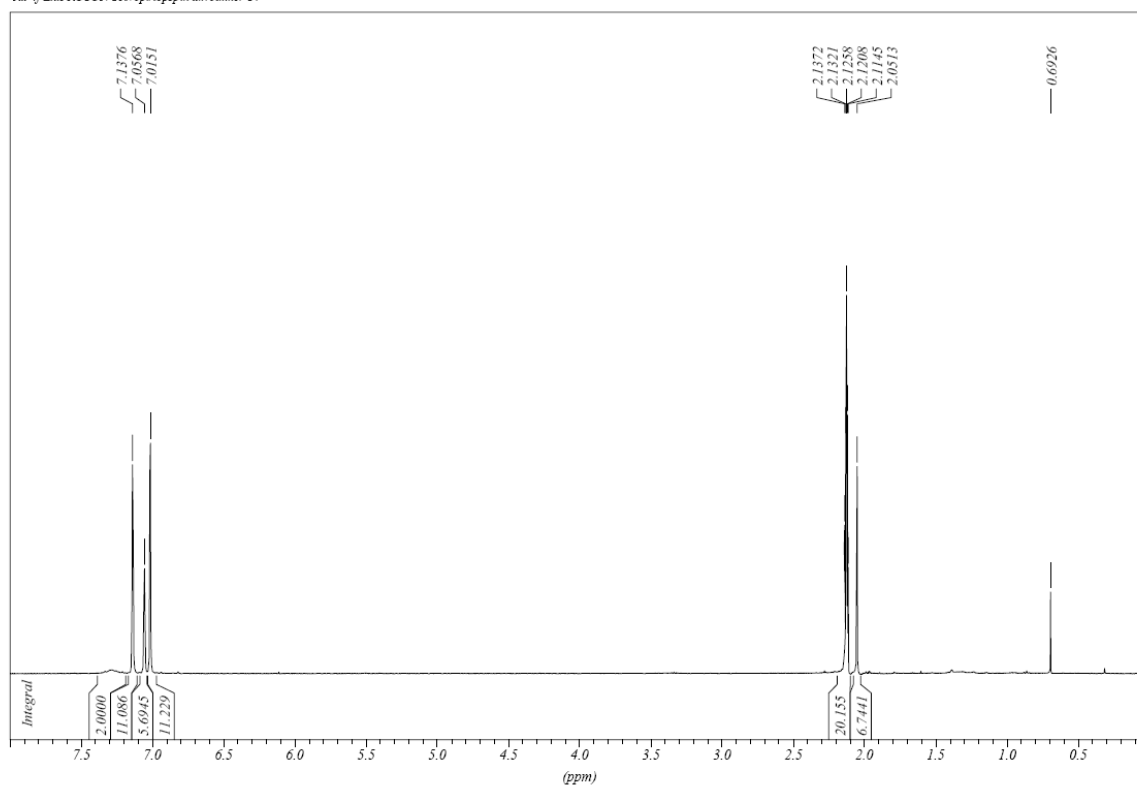

**Fig. S1.**  $^1\text{H-NMR}$  of **2** in toluene- $d^8$ .

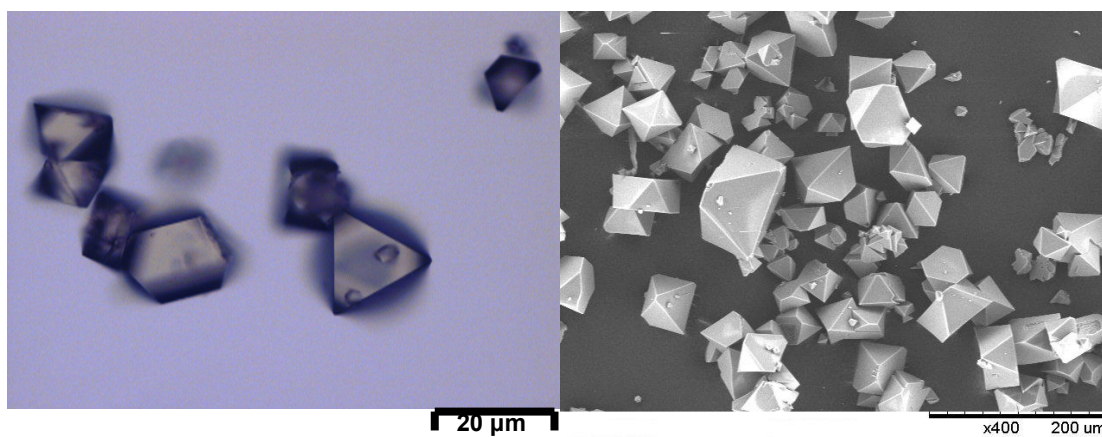

**Fig. S2.** Optical and scanning electron micrographs of compound **1**

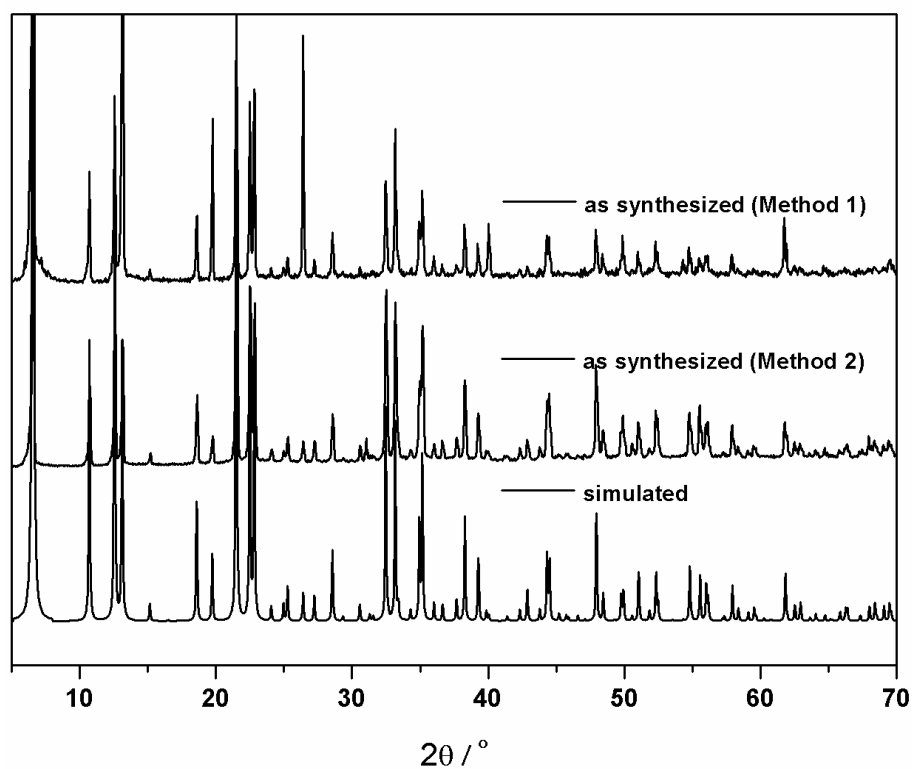

**Fig. S3.** Comparison of XRPD patterns of compound **1** (synthesized by two different methods) with a simulated XRPD pattern, as calculated from single crystal X-ray data.

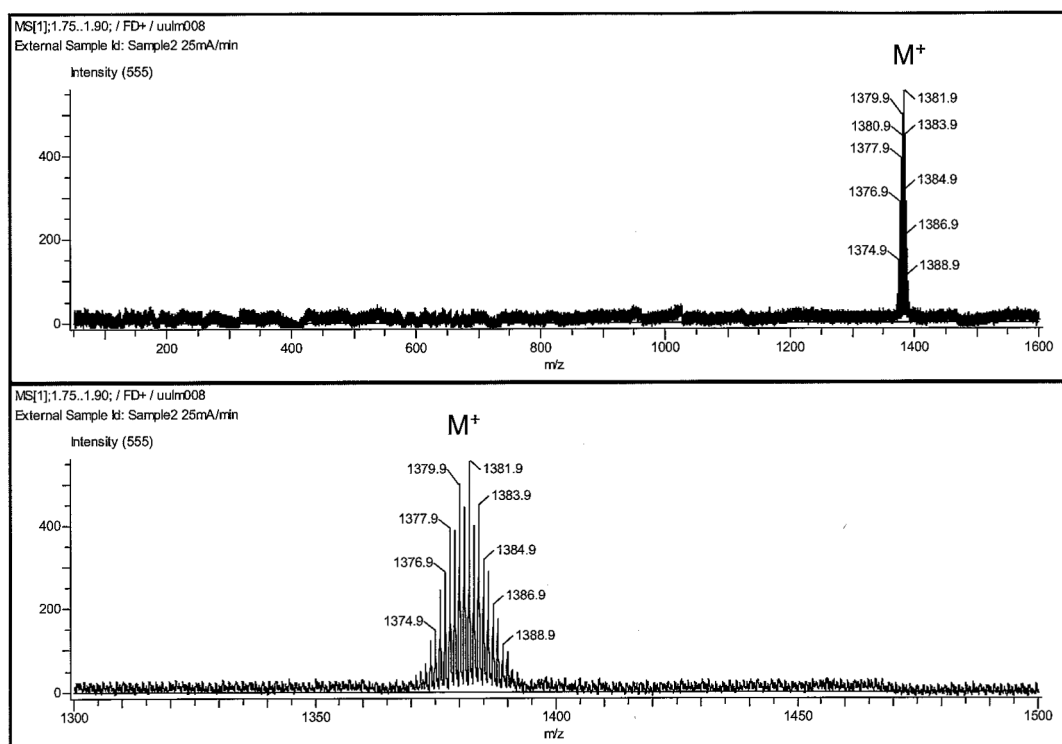

**Fig. S4. (a)** LIFDI mass spectrum of compound **1** (taken from an ethyl acetate solution) (Top:  $m/z$  50-1600, bottom:  $m/z$  1300-1500).

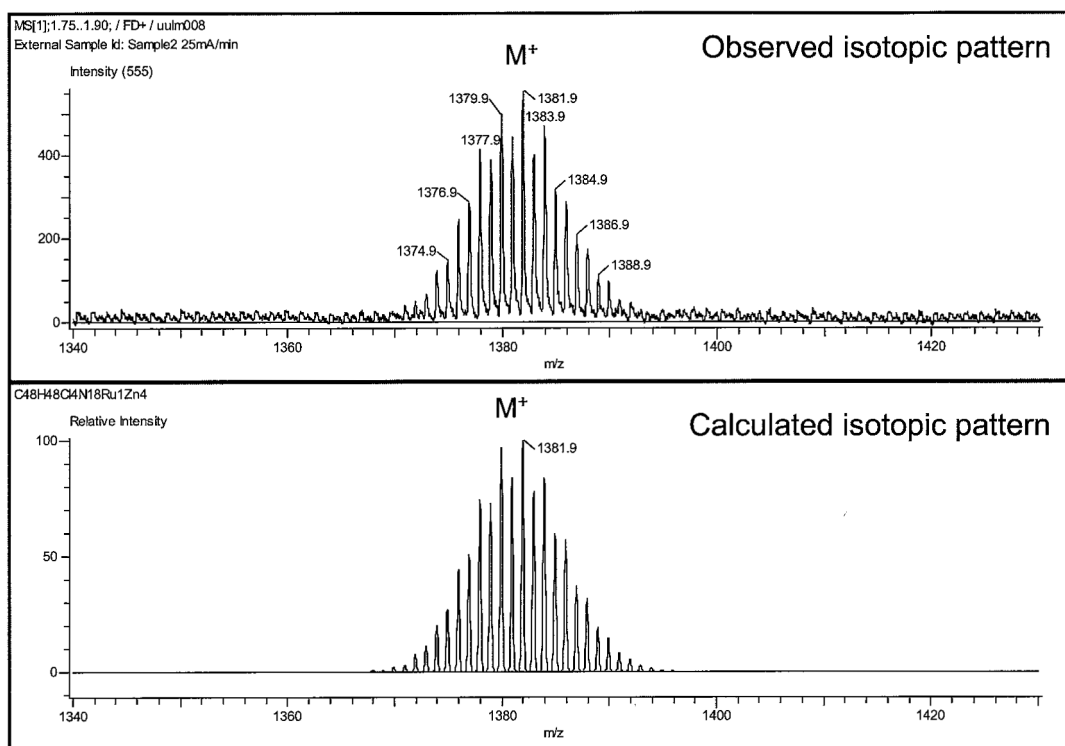

**Fig. S4. (b)** LIFDI mass spectrum of compound **1** (taken from an ethyl acetate solution). Top: observed, bottom: calculated mass spectrum.

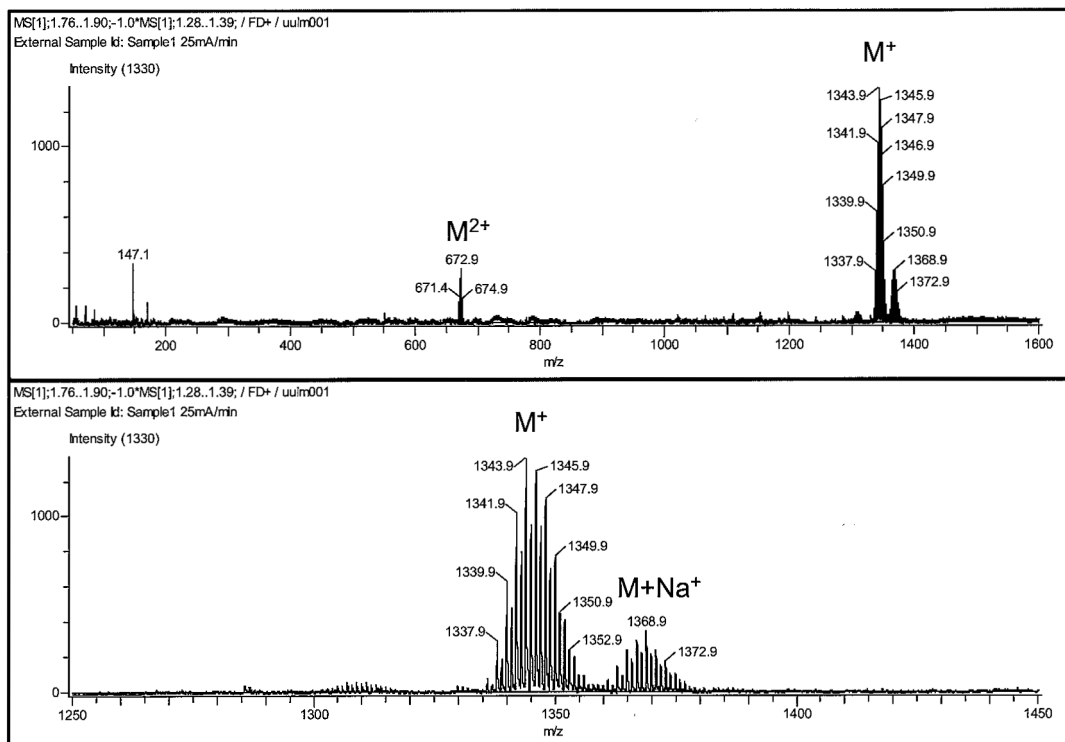

**Fig. S5 (a).** LIFDI mass spectrum of compound **2** (taken from an ethyl acetate solution). (Top: m/z 50-1600, bottom: m/z 1250-1450).

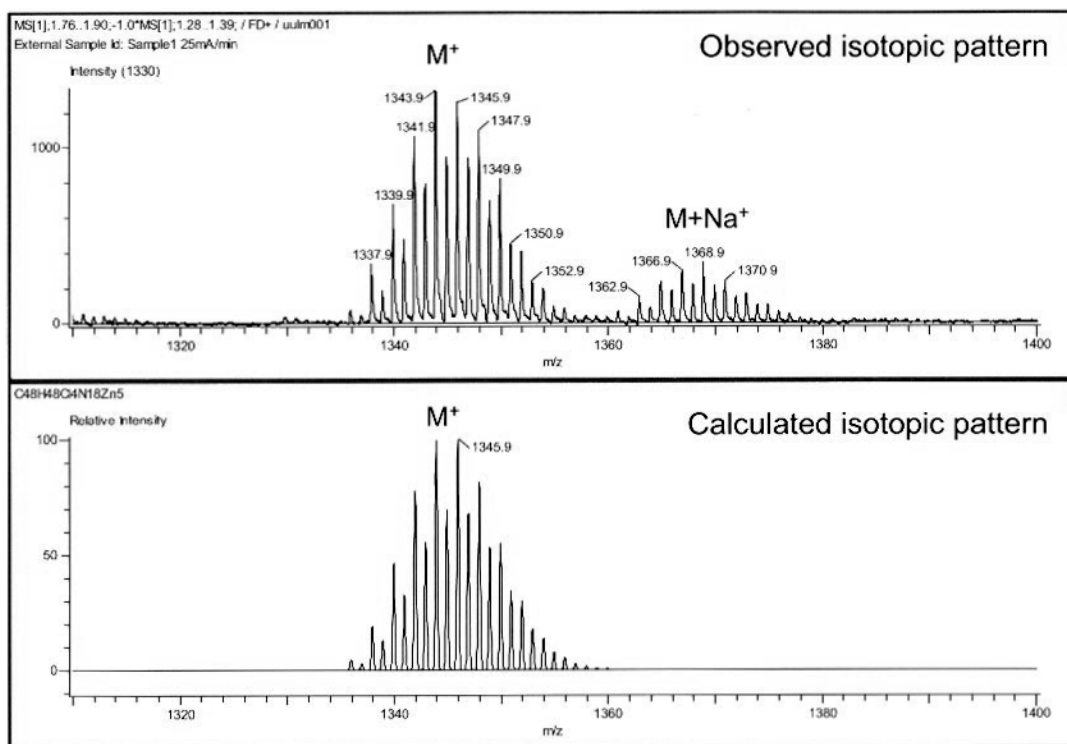

**Fig. S5. (b)** LIFDI mass spectrum of compound 2 (taken from an ethyl acetate solution). Top: observed, bottom: calculated mass spectrum.

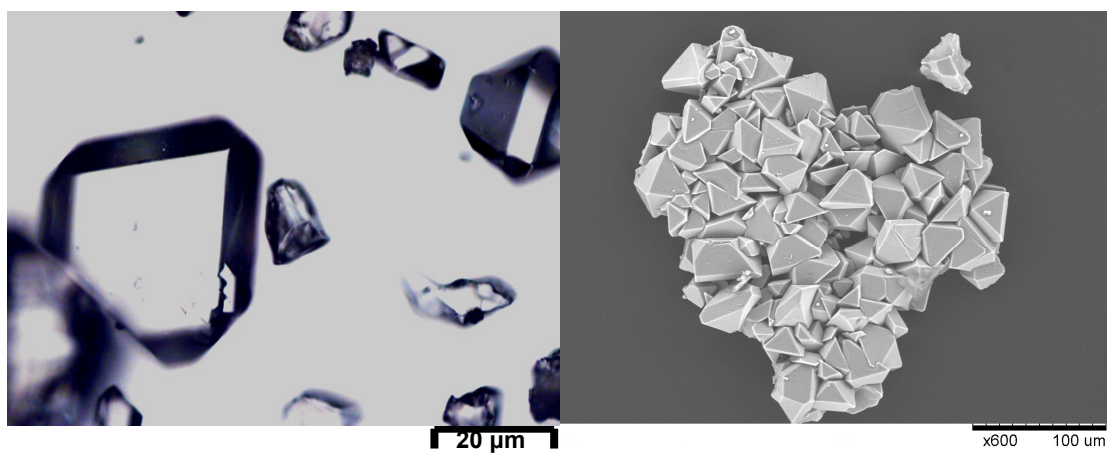

**Fig. S6.** Optical and scanning electron micrographs of compound 3

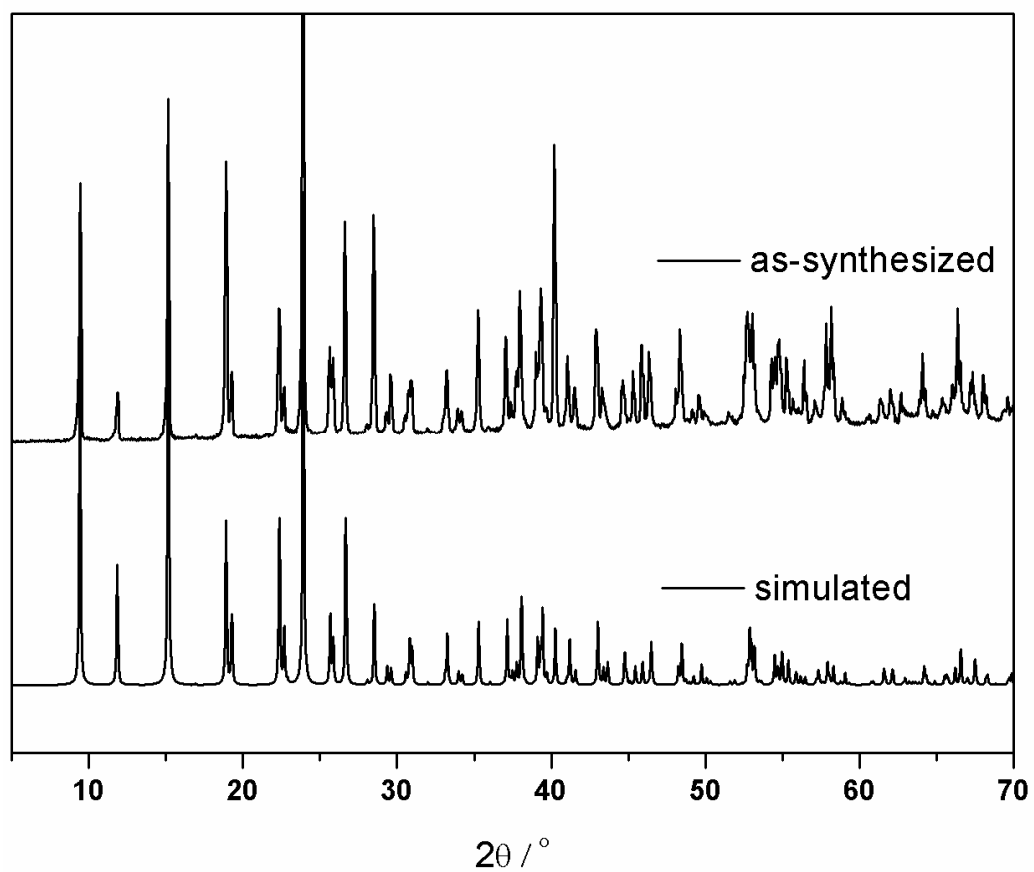

**Fig. S7.** Comparison of the experimentally observed XRPD pattern of compound **3** with a simulated XRPD pattern, as calculated from single crystal X-ray data..

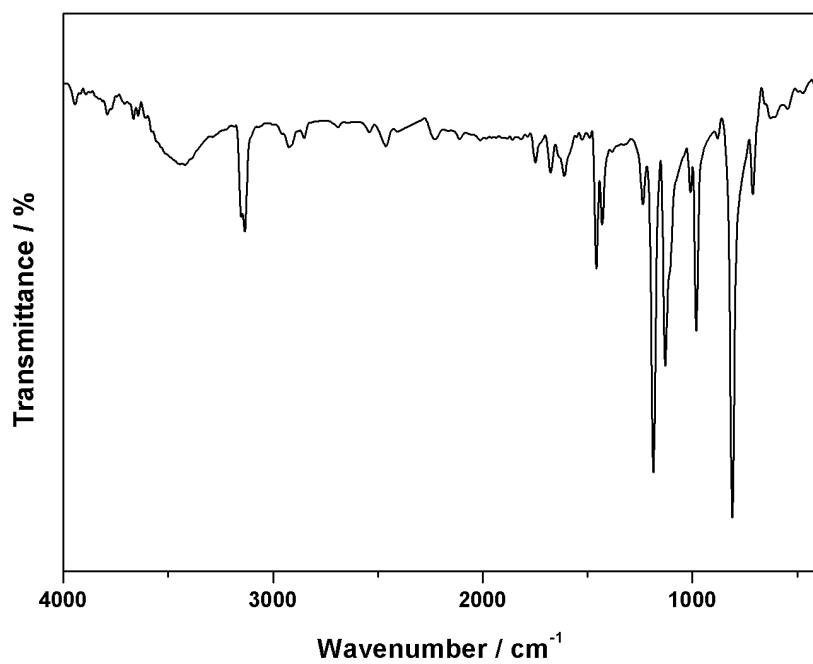

**Fig. S8.** FT-IR spectrum of  $\text{Zn}_5\text{Cl}_4(\text{ta})_6$  (3)

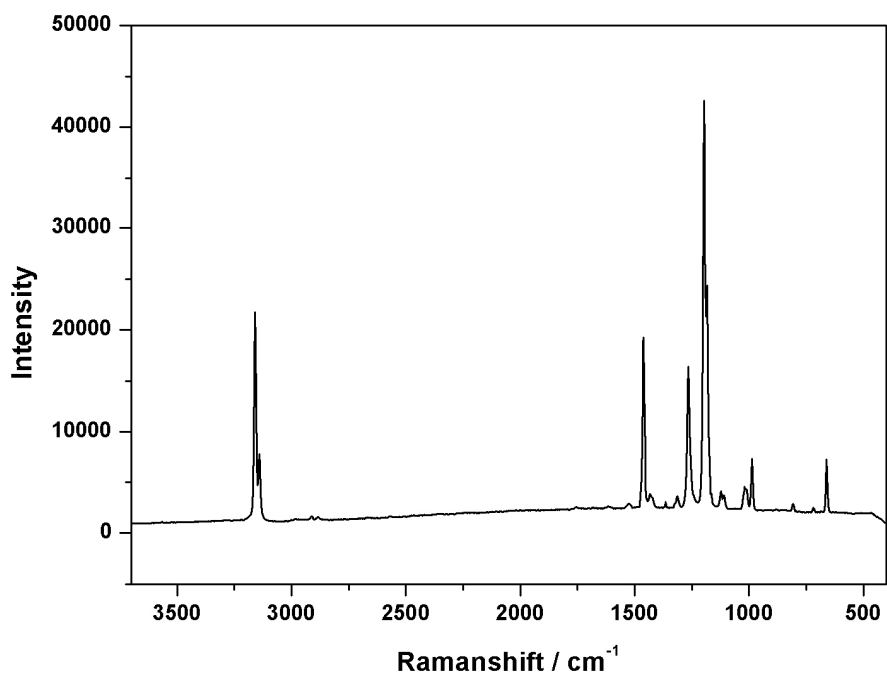

**Fig. S9.** Raman spectrum of  $\text{Zn}_5\text{Cl}_4(\text{ta})_6$  (3)



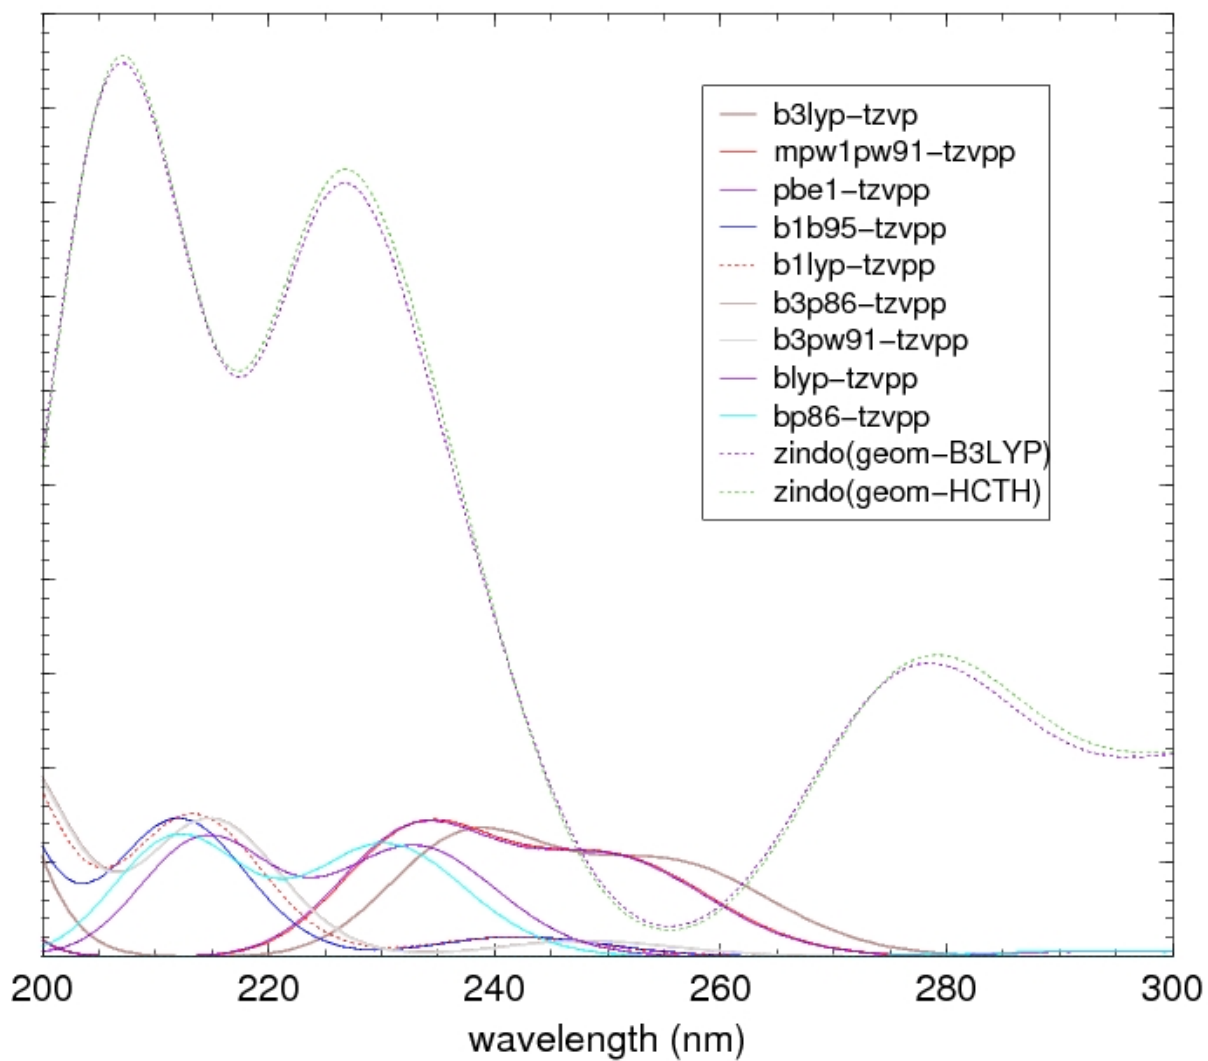

**Fig. S10.** UV-Vis spectra of btaH (1H-1,2,3-benzotriazole) as calculated by different methods: TDDFT (functionals and basis sets as specified) and ZINDO.

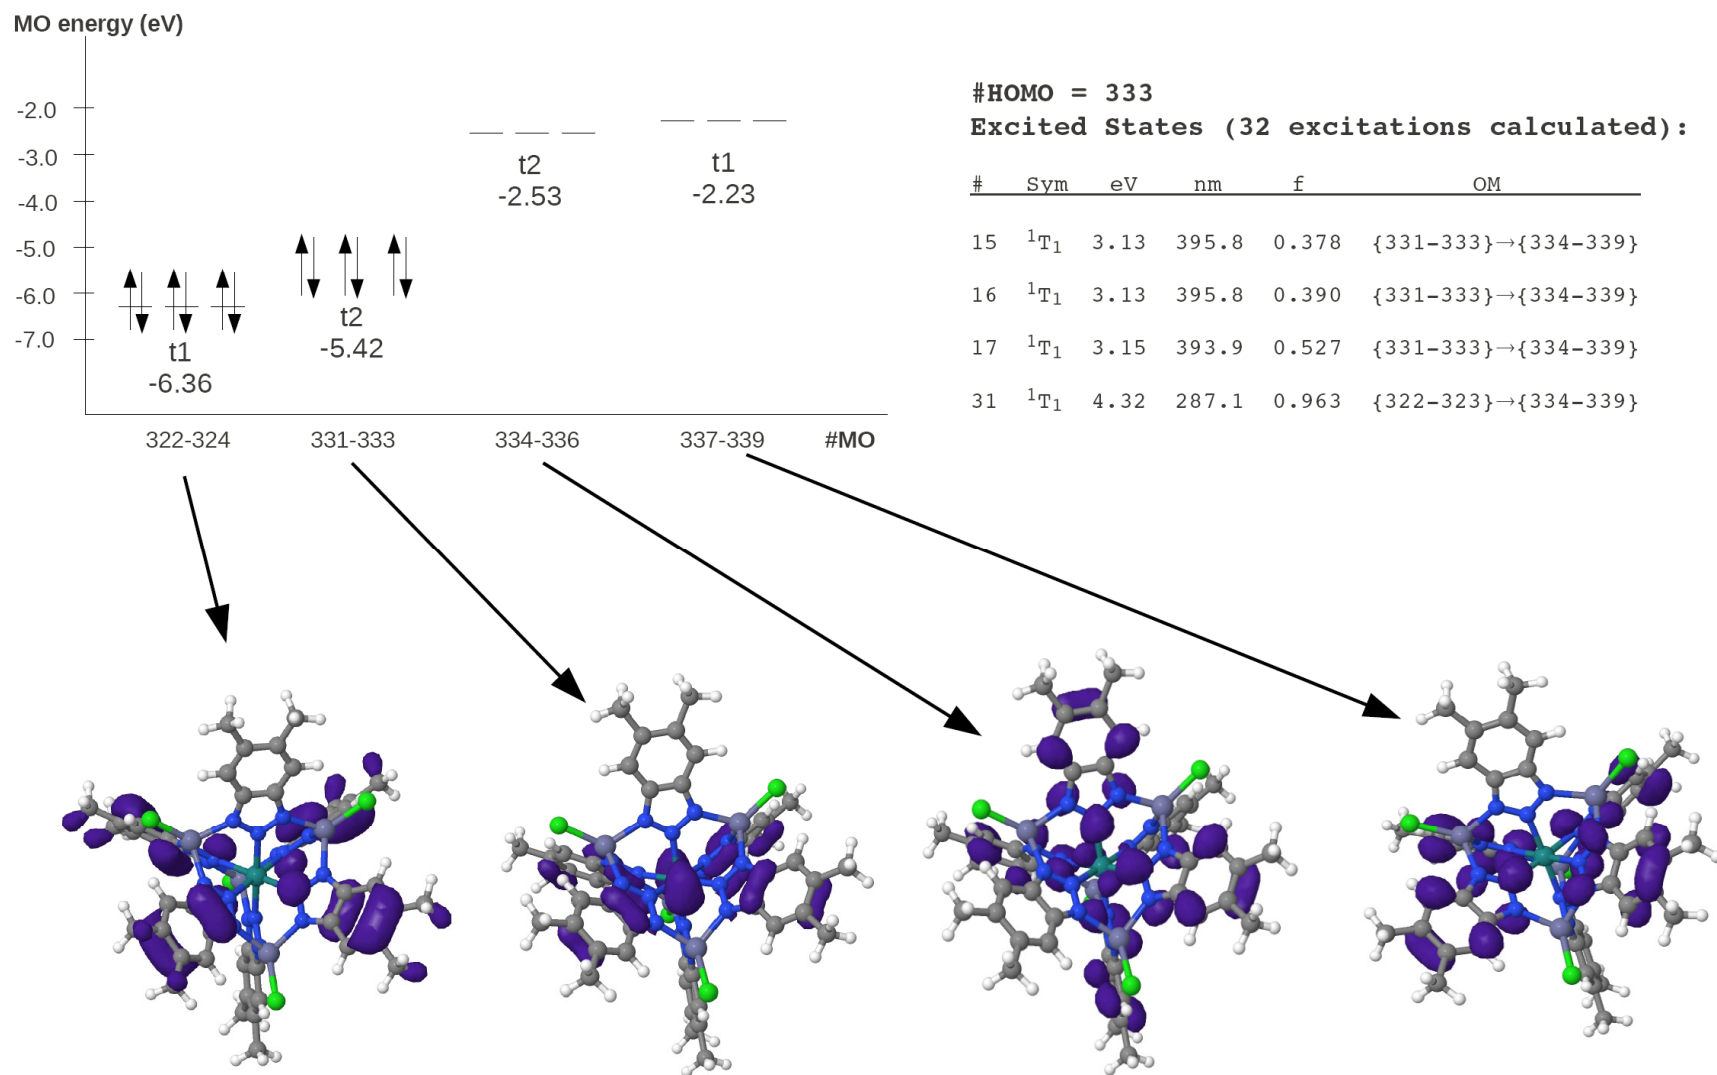

**Fig. S11.** Main components of the two bands in the UV-Vis spectrum of compound **1**,  $[\text{RuZn}_4\text{Cl}_4(\text{Me}_2\text{bta})_6]$  (cf. Fig. 11 in the manuscript). 'f' is the oscillator strength. The band at 393-396 nm is of MLCT type, whereas the band at 287 nm is a LLCT.

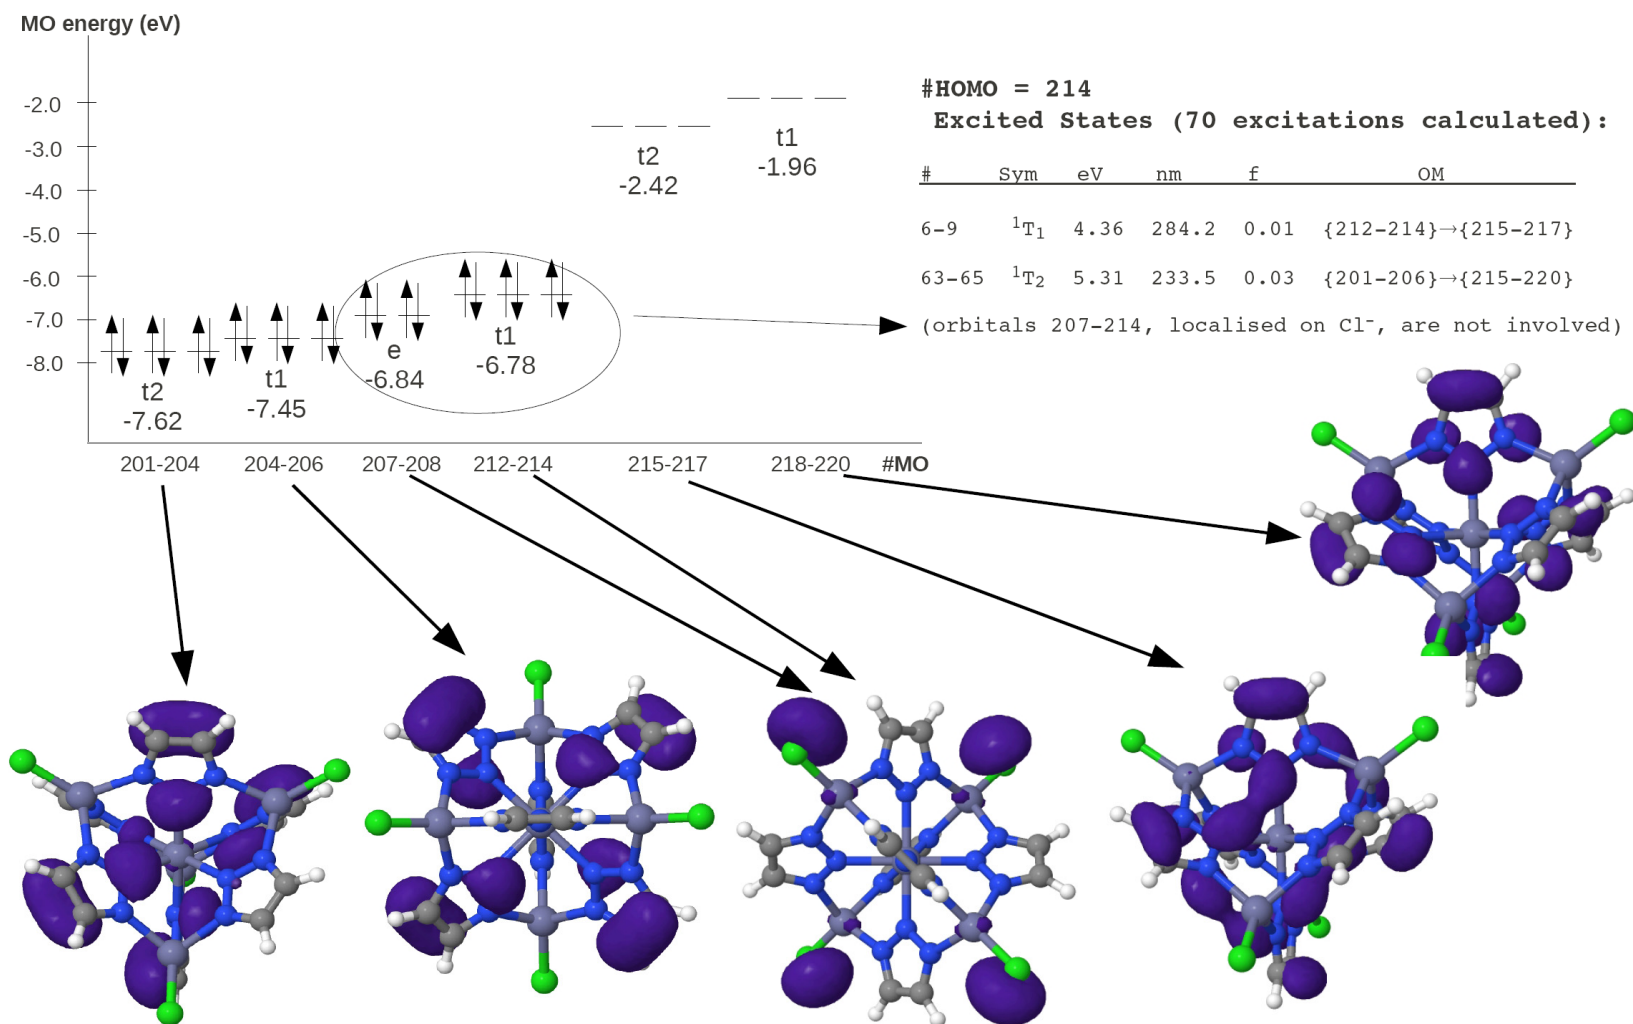

**Fig. S12.** Main components of the two bands in the UV-Vis spectrum of compound **3**, [Zn<sub>5</sub>Cl<sub>4</sub>(ta)<sub>6</sub>] (cf. Fig. 11 in the manuscript). 'f' is the oscillator strength. The bands at 284 and 233 nm are of LLCT type.

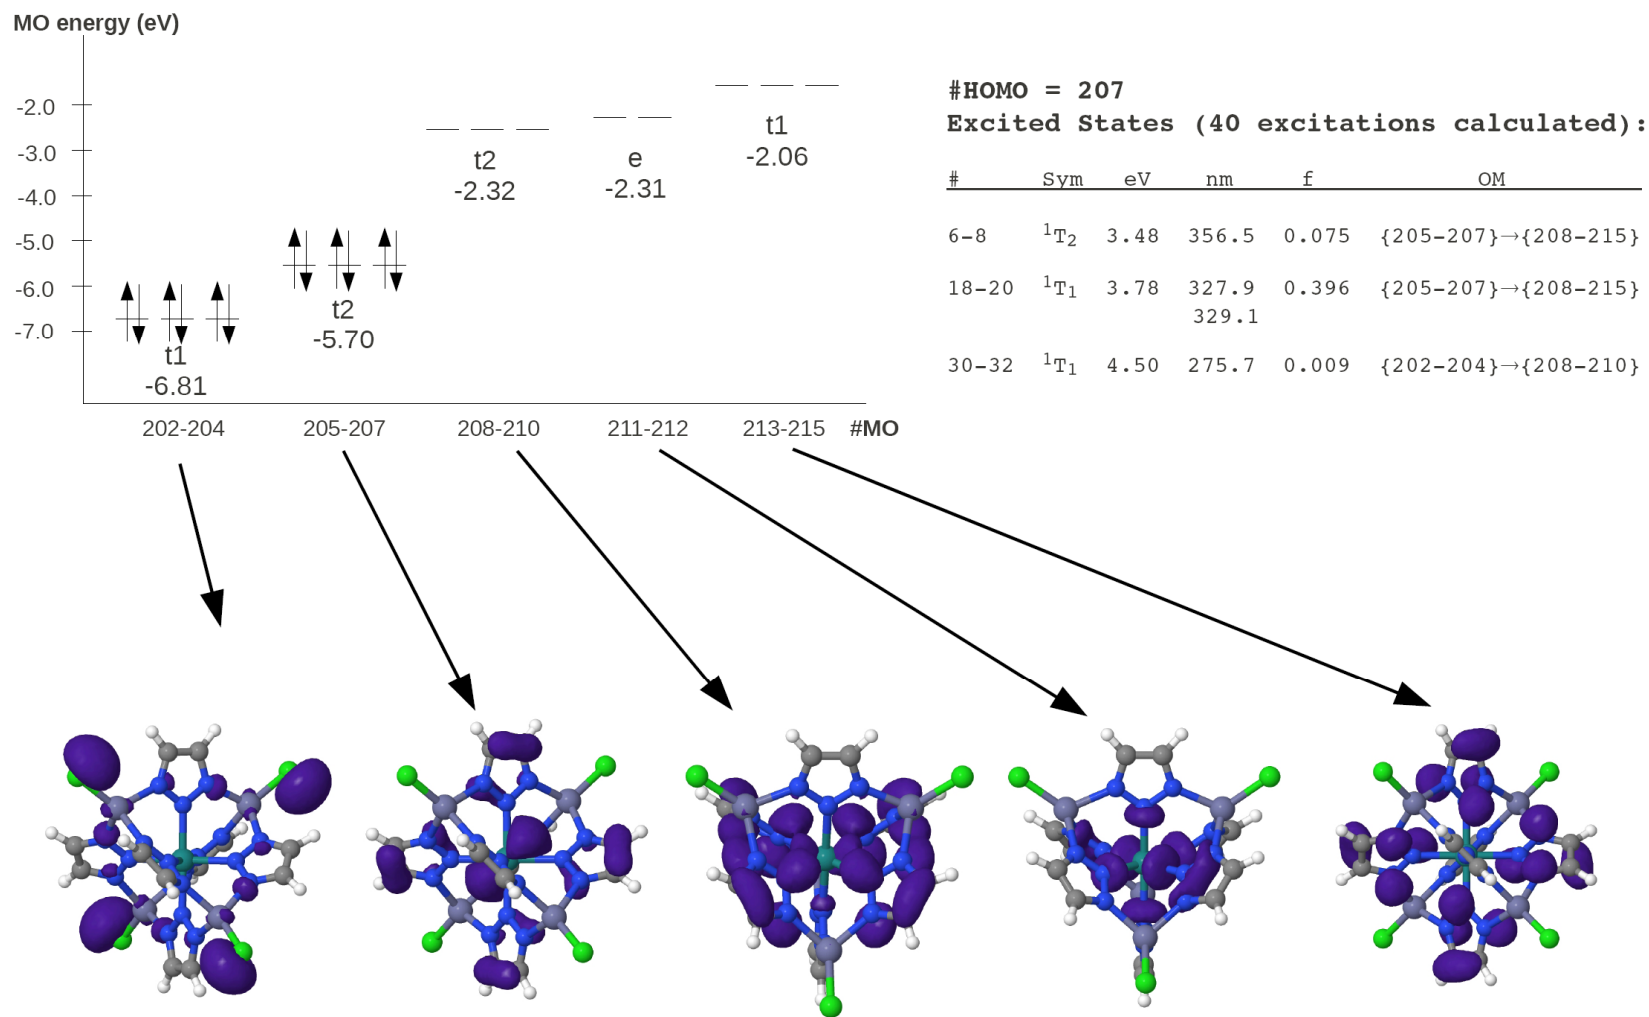

**Fig S13.** Main components of the two bands in the UV-Vis spectrum of **3-Ru**, [RuZn<sub>4</sub>Cl<sub>4</sub>(ta)<sub>6</sub>] (cf. Fig. 11 in the manuscript). 'f' is the oscillator strength. The bands at 357 and 328 nm are of d-d and MLCT type whereas the band at 276 nm is a LLCT involving the Cl ligands.

**Table S1.** UV/Vis and steady-state fluorescence spectroscopic data of the three compounds

| Samples                             | abs.<br>$\lambda_{\text{max}}$ (nm) | Emission,<br>$\lambda_{\text{max}}$ (nm)                                                 | Excitation,<br>$\lambda_{\text{max}}$ (nm) | Quantum Yield | $\tau$ (ns)                                                                                  | Photostability/ $\tau$ (ns)                   |                                                |
|-------------------------------------|-------------------------------------|------------------------------------------------------------------------------------------|--------------------------------------------|---------------|----------------------------------------------------------------------------------------------|-----------------------------------------------|------------------------------------------------|
|                                     |                                     |                                                                                          |                                            |               |                                                                                              | before kinetic scan                           | after kinetic scan                             |
| <b>From solution (Acetonitrile)</b> |                                     |                                                                                          |                                            |               |                                                                                              |                                               |                                                |
| <b>Me<sub>2</sub>btaH</b>           | 264, 282                            | 337( $\lambda_{\text{exc}}=260$ )                                                        | 281, 290( $\lambda_{\text{emi}}=337$ )     | 1.90%         | 1.76(93.66%), 5.04(6.34%)                                                                    | 1.74(81.41%),<br>5.03(18.59%)                 | 0.47(5.10%),<br>2.44(65.41%),<br>4.58(29.49%)  |
| <b>(2)</b>                          | 282                                 | 356( $\lambda_{\text{exc}}=287$ )                                                        | -                                          | 68.40%        | 2.11(3.1%), 6.05(96.9%)                                                                      | 3.78(10.87%),<br>6.05(89.13%)                 | 1.26(17.85%),<br>3.42(54.00%),<br>8.13(28.14%) |
| <b>(1)</b>                          | 282, 335                            | 310( $\lambda_{\text{exc}}=250$ );<br>345( $\lambda_{\text{exc}}=273$ )<br>TRES solution | 280( $\lambda_{\text{emi}}=310$ )          | 1.80%         | 2.9(20.63%), 7.61(79.37%)                                                                    | 4.22(52.66%),<br>10.12(42.04%),<br>1.07(5.3%) | 4.36(54.31%),<br>10.60(37.73%),<br>1.02(7.95%) |
| <b>Powdered form</b>                |                                     |                                                                                          |                                            |               |                                                                                              |                                               |                                                |
| <b>Me<sub>2</sub>btaH</b>           | -                                   | 350( $\lambda_{\text{exc}}=260$ )                                                        | -                                          | -             | 0.23(93.66%), 5.04 (6.34%)                                                                   | -                                             | -                                              |
| <b>(2)</b>                          | -                                   | 364( $\lambda_{\text{exc}}=287$ );<br>461( $\lambda_{\text{exc}}=350$ )                  | -                                          | -             | 0.14(9.76%), 2.65(88%), 6.57(2.24%); for<br>2nd emi. 0.35(4.9%), 3.33(75.12%),<br>6.2(19.98) | -                                             | -                                              |
| <b>(1)</b>                          | -                                   | 317( $\lambda_{\text{exc}}=260$ )                                                        | 276( $\lambda_{\text{emi}}=322$ )          | -             | 316.7(2.72%), 2350(17.56%),<br>17400(79.7%)                                                  | -                                             | -                                              |

**Sample: Me<sub>2</sub>btaH:** 5,6-Dimethyl-1H-benzotriazole; **(2):** [Zn<sub>5</sub>Cl<sub>4</sub>(Me<sub>2</sub>bta)<sub>6</sub>]·2DMF; **(1):** [Ru<sup>II</sup>Zn<sub>4</sub>Cl<sub>4</sub>(Me<sub>2</sub>bta)<sub>6</sub>]·2DMF

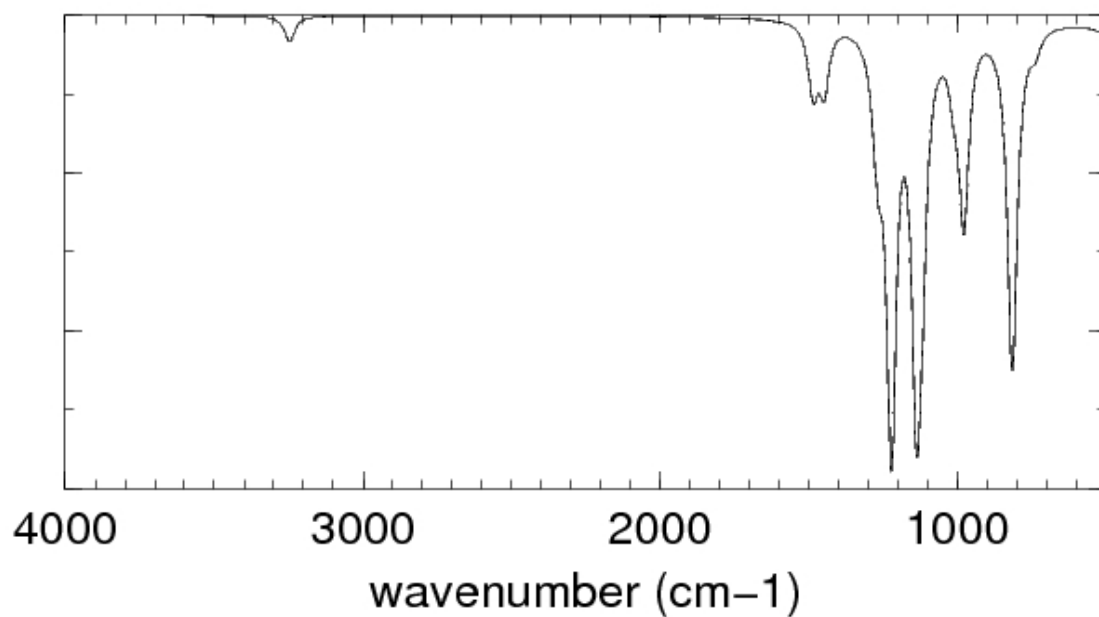

**Fig. S14.** DFT (HCTH-TZVPP) calculated infrared spectrum of (**3**). Compare to **Fig. S8**. The main features are: 815 (CH out of plane), 978 (ta skeleton, CCN bending), 1138 (HCN bending), 1222 (ZnN asym. stretching), 1448 (CN stretching or HCN bending), 1485 (C=C stretching) and 3245 (CH stretching).

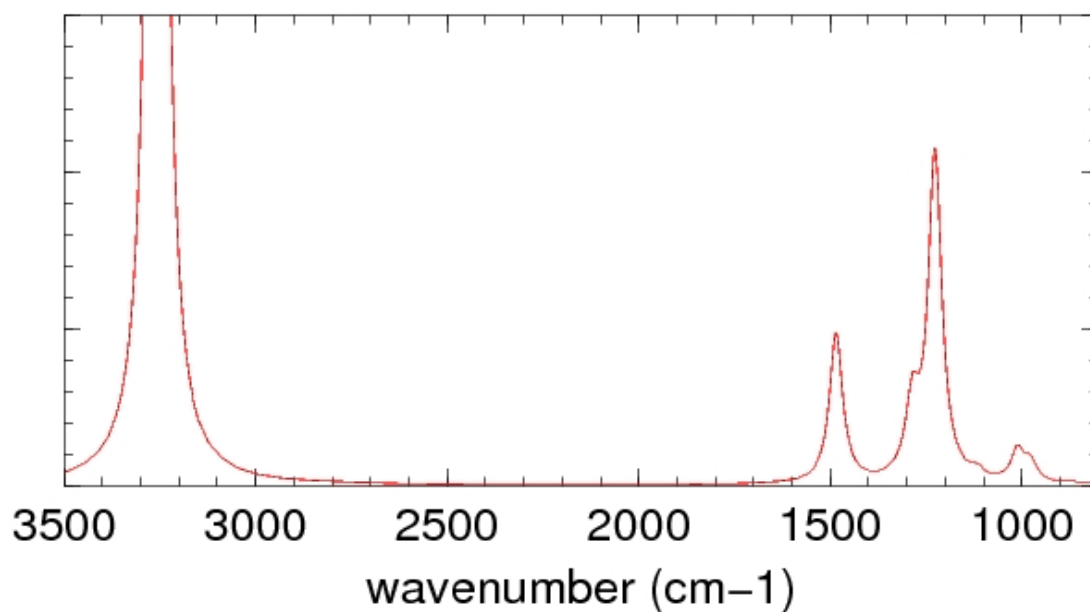

**Fig. S15.** DFT (HCTH-TZVPP) calculated Raman spectrum of (**3**), which gives as main active bands: 1011 (HCN bending), 1226 (ZnN stretching), 1281 (CN stretching), 1486 (CC stretching) and 3263 (CH stretching). Compare to **Fig. S9**.

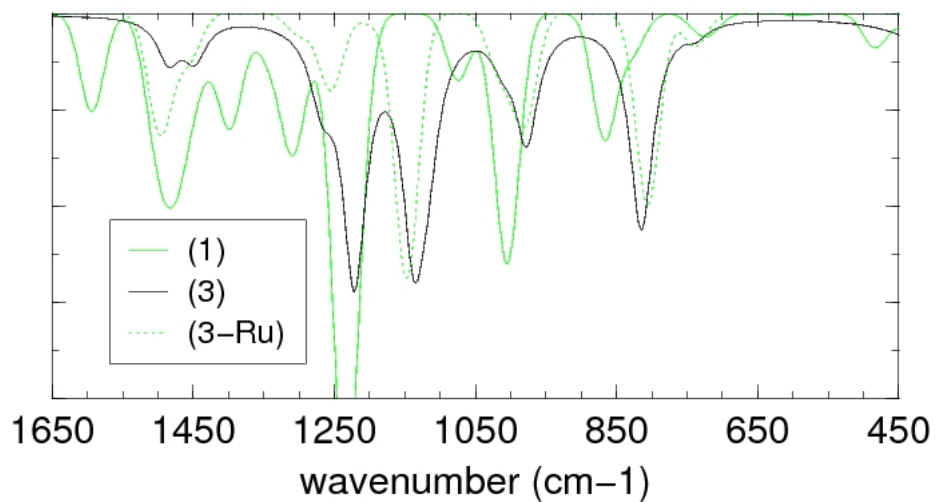

**Fig. S16.** Comparative features of DFT (HCTH-TZVPP) calculated infrared spectra of compounds **1**, **3** and **3-Ru**.

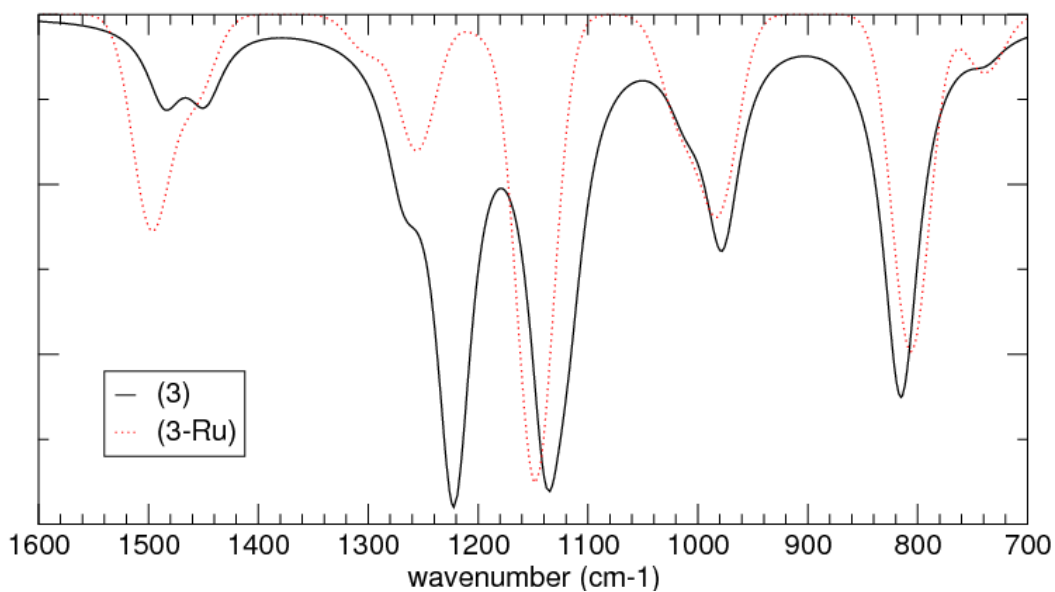

**Fig. S17.** Comparative features of DFT (HCTH-TZVPP) calculated infrared spectra of compounds **3** and **3-Ru**. Top and bottom figures have different scales of intensity.

**Table S2.** Active normal vibrational modes in the infrared spectra of compounds **3** and **3-Ru**, as calculated from DFT (HCTH-TZVPP). See **Figs. S16** and **S17**.

| ( <b>3</b> ) (calc) (cm <sup>-1</sup> ) | Assignment                              | ( <b>3-Ru</b> ) (calc) (cm <sup>-1</sup> ) |
|-----------------------------------------|-----------------------------------------|--------------------------------------------|
|                                         | ZnCl stretching                         | 50                                         |
|                                         | ClZnN bending                           | 51                                         |
|                                         | Frame                                   | 163                                        |
|                                         | RuN stretching                          | 216                                        |
| 230                                     | ZnN asymmetric stretching               | 247                                        |
| 359                                     | ZnCl stretching                         |                                            |
|                                         | NNZn bending                            | 380                                        |
| 738                                     | NNN out of plane                        | 739                                        |
| 815                                     | HCN out of plane                        | 806                                        |
| 980                                     | NCC bending                             | 983                                        |
| 1010                                    | HCX asymmetric bending                  | 1010                                       |
| 1136                                    | HCC symmetric bending                   | 1148                                       |
| 1223                                    | ZnN stretching                          |                                            |
| 1260                                    | NN asymmetric stretching<br>HCC bending | 1255                                       |
| 1450                                    | CN stretching                           |                                            |
| 1485                                    | CC stretching<br>HCN bending            | 1497                                       |
| 3248                                    | CH asymmetric stretching                | 3250                                       |



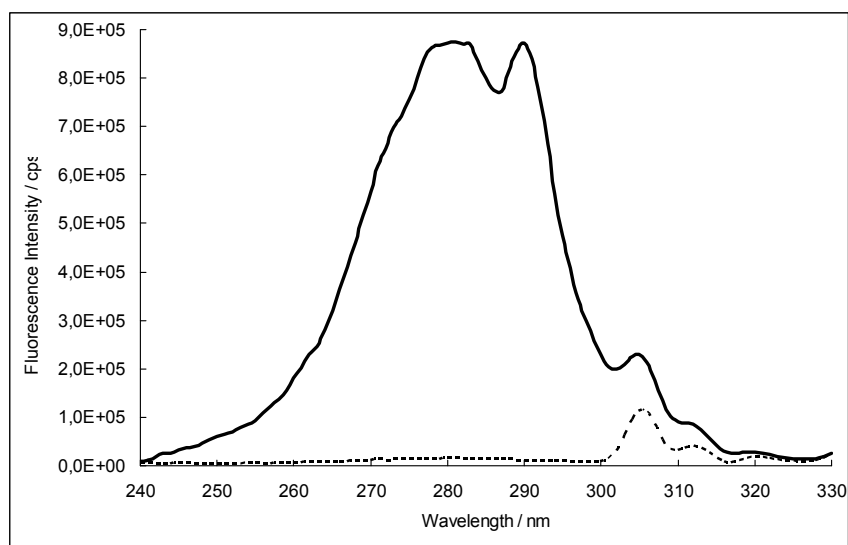

**Fig. S18.** Fluorescence excitation spectra of Me<sub>2</sub>btaH in acetonitrile solution (—) and acetonitrile reference (---)

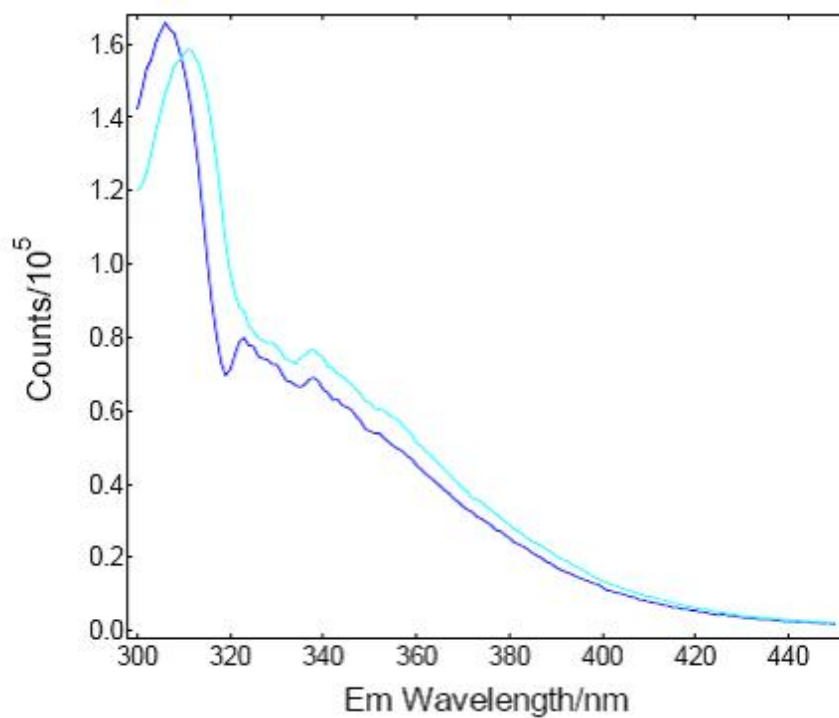

**Fig. S19.** Raman signals swamping the emission spectra of compound **1** (light blue,  $\lambda_{\text{EXC.}}=284\text{nm}$ , dark blue,  $\lambda_{\text{EXC.}}=280\text{nm}$ ).

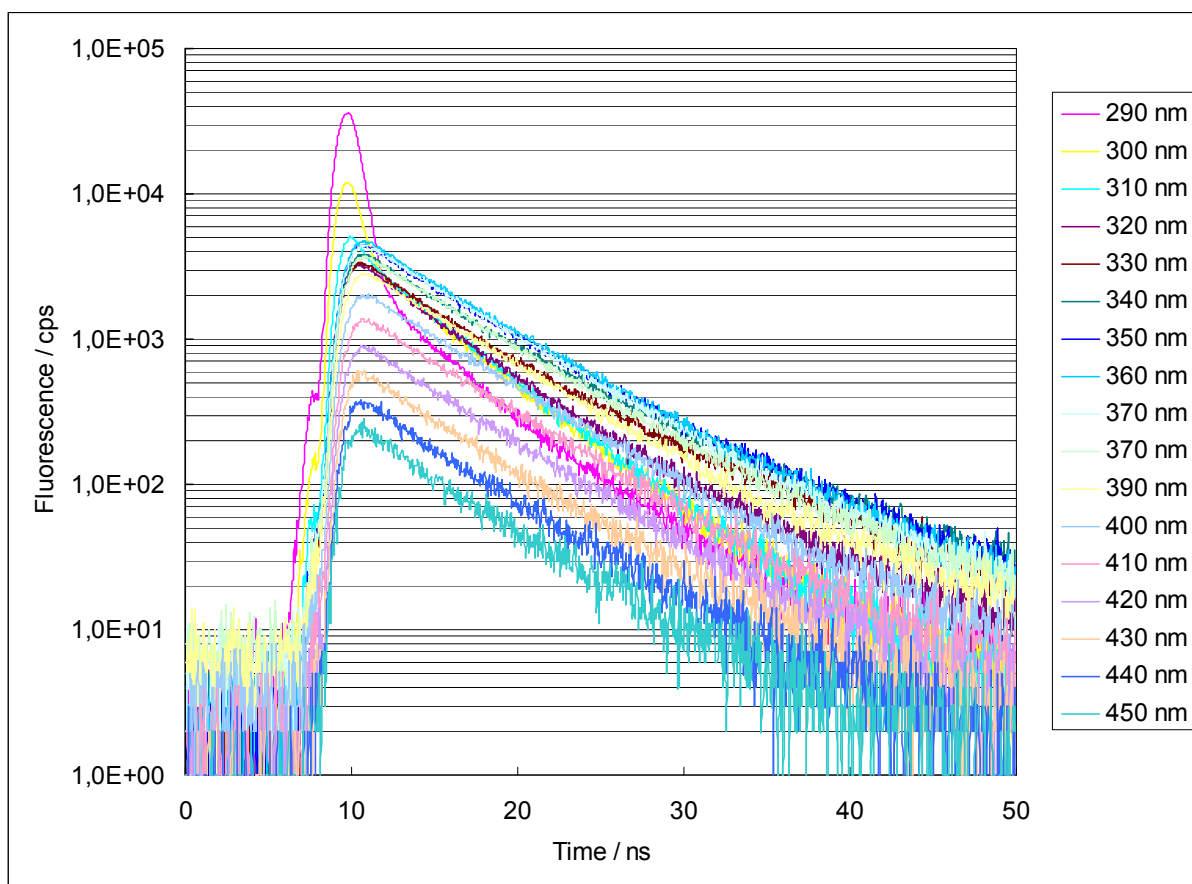

**Fig. S20.** TRES (Time Resolved Emission Spectrum) of **1**,  $\lambda_{\text{EXC.}} = 273\text{nm}$

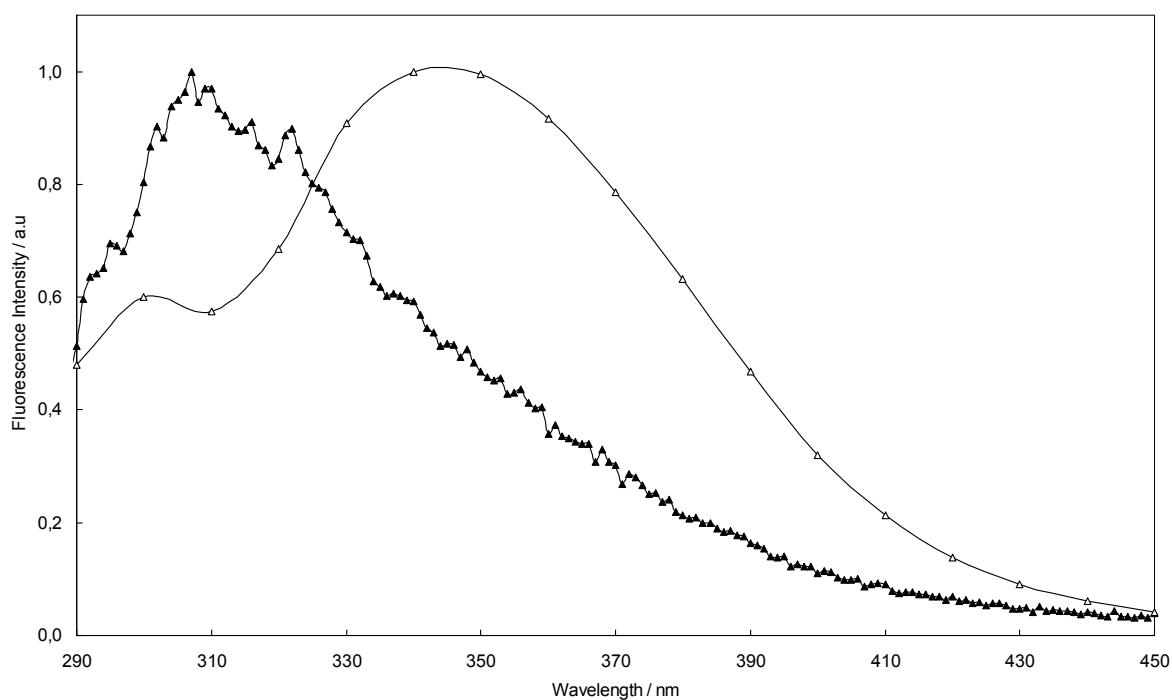

**Fig. S21.** Steady-state emission ( $\blacktriangle$ ,  $\lambda_{\text{EXC.}}=250\text{ nm}$ ) and quasi-steady-state ( $\triangle$ ,  $\lambda_{\text{EXC.}}=273\text{ nm}$ ) spectra of compound **1**.

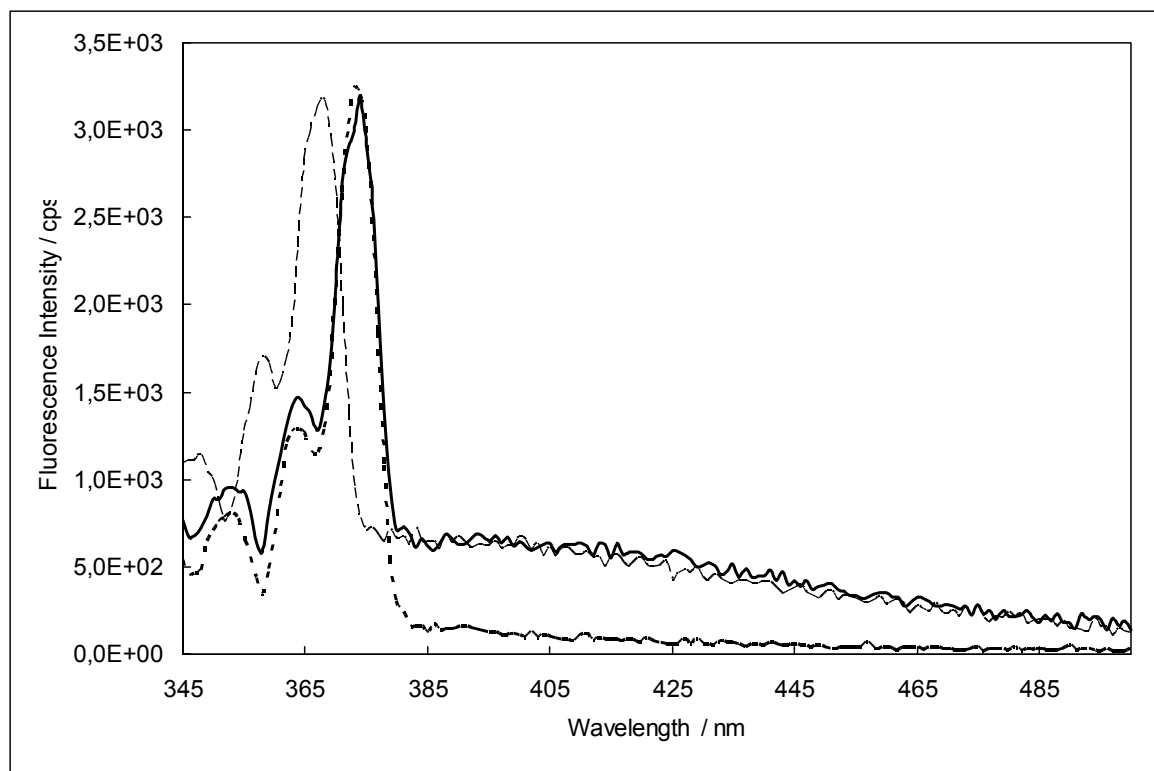

**Fig. S22.** Steady-state spectra of acetonitrile ( $\lambda_{\text{EXC.}}=335$  nm,  $\cdots$ ), **1** in acetonitrile, ( $\lambda_{\text{EXC.}}=330$ ,  $----$ ), **1** in acetonitrile ( $\lambda_{\text{EXC.}}=335$  nm,  $—$ )

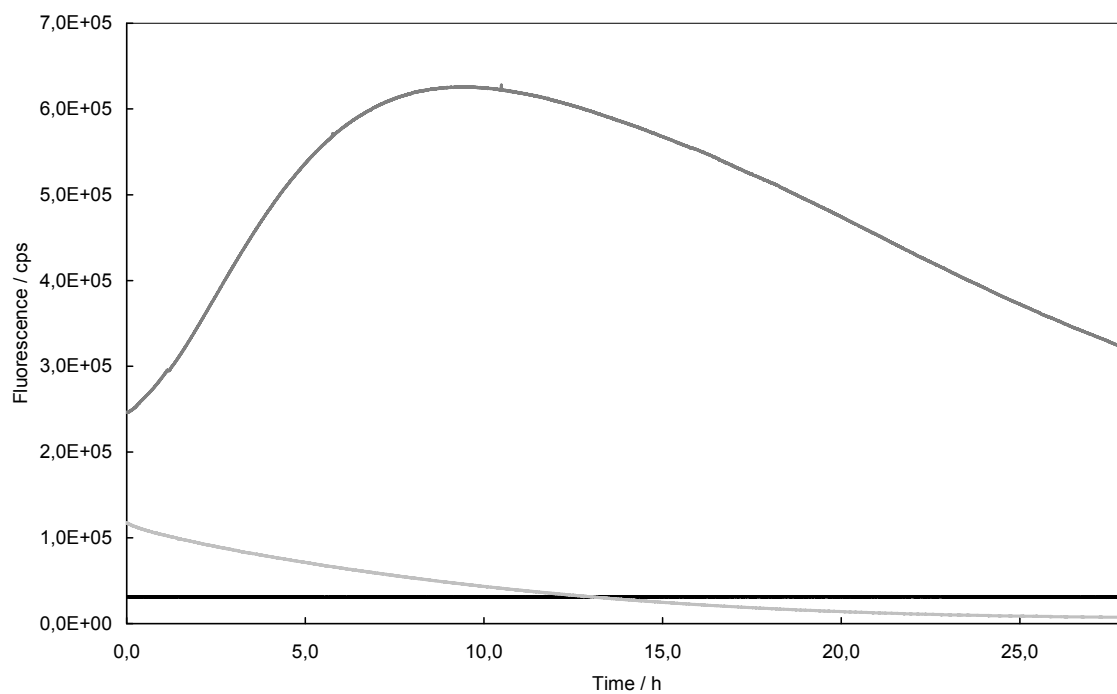

**Fig. S23.** Kinetic scan of **1** (black), **2** (light grey) and Me<sub>2</sub>btaH (dark grey).

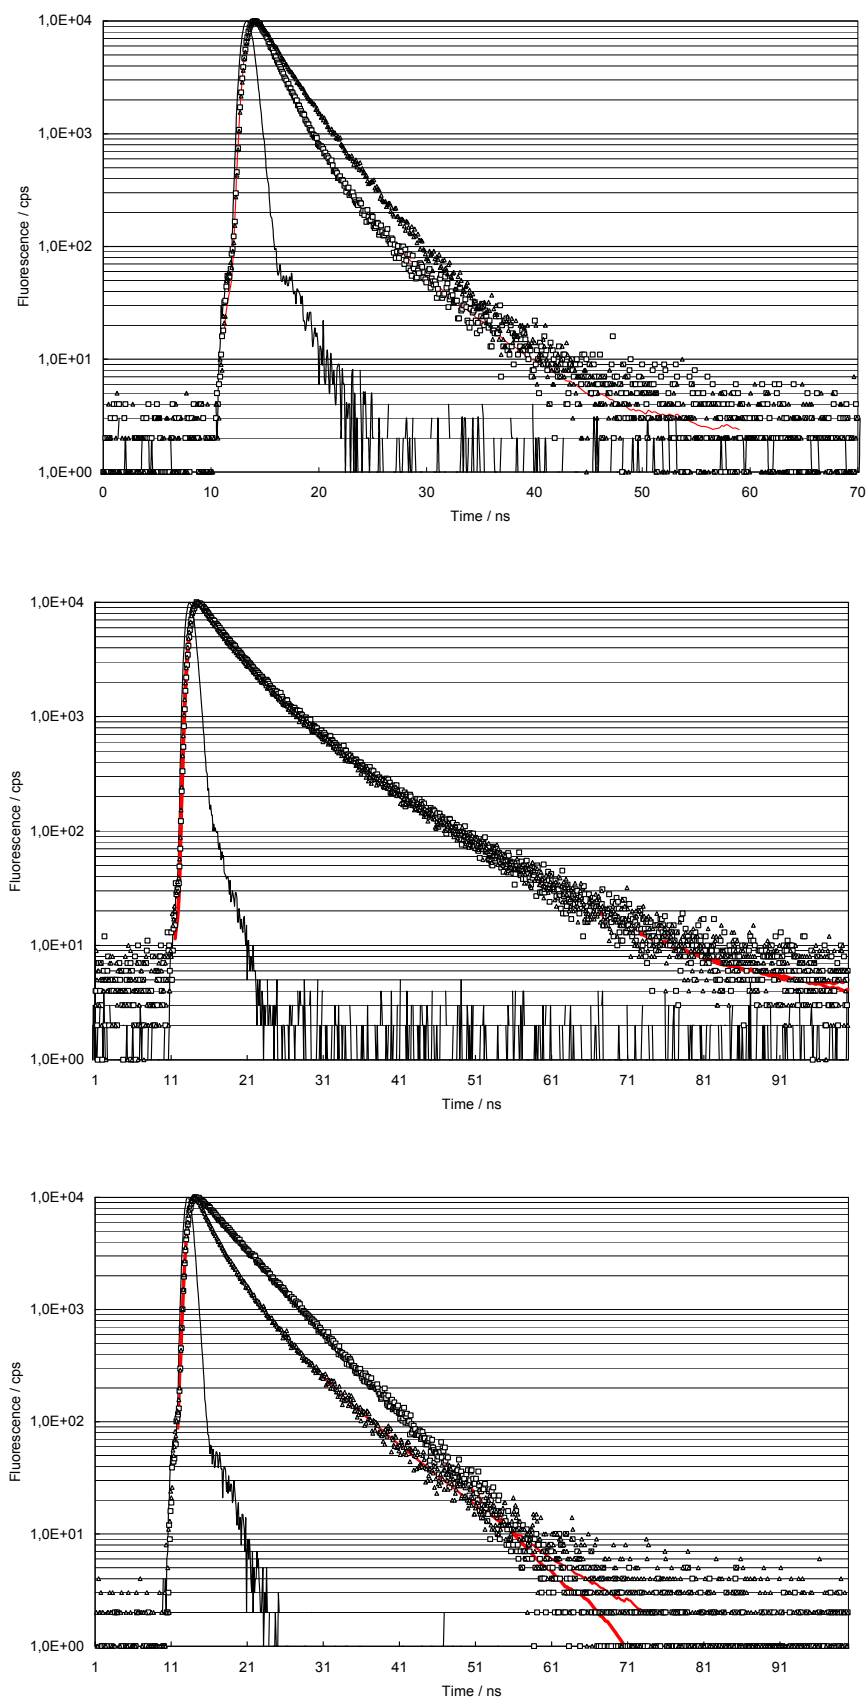

**Fig. S24.** Fluorescence decays of Me<sub>2</sub>btaH (top), **1** (middle) and **2** (bottom) before (□) and after (△) photobleaching. IRF (—), Fit (—),  $\lambda_{\text{EXC.}}=280\text{nm}$ ,

**Table S3.** Experimental Conditions of steady-state and lifetime measurements of **1**

|          | Measurement                  | $\lambda_{\text{EXC.}}$ (nm) | Excitation bandpass (nm) | $\lambda_{\text{EMI.}}$ (nm) | Emission Bandpass (nm) |
|----------|------------------------------|------------------------------|--------------------------|------------------------------|------------------------|
| Solution | Steady-state excitation scan | 250-295                      | 2                        | 310                          | 10                     |
| Solution | Steady-state emission scan   | 250                          | 10                       |                              | 2                      |
| Solution | Lifetime                     | 273                          | 11                       | 340                          | 15                     |
| Solution | Quantum Yield                | 282                          | 1                        |                              | 1                      |
| Powder   | Steady-state excitation scan | 250-300                      | 2                        | 322                          | 10                     |
| Powder   | Steady-state emission scan   | 260                          | 8                        |                              | 5                      |
| Powder   | Lifetime                     | 273                          | 11                       | 380                          | 10                     |

**Table S4.** Experimental conditions of steady state and lifetime measurements of **2**

|          | Measurement                                 | $\lambda_{\text{EXC.}}$ (nm) | Excitation bandpass (nm) | $\lambda_{\text{EMI.}}$ (nm) | Emission Bandpass (nm) | $\lambda_{\text{MAX}}$ (nm) |
|----------|---------------------------------------------|------------------------------|--------------------------|------------------------------|------------------------|-----------------------------|
| Solution | Steady-state excitation scan                | 240-340                      | 1                        | 356                          | 1                      |                             |
| Solution | Steady-state emission scan                  | 287                          | 1                        |                              | 1                      |                             |
| Powder   | Steady-state excitation scan                |                              | 1                        | 364                          | 1                      |                             |
| Powder   | Steady-state emission scan                  | 318                          | 1                        |                              | 1                      |                             |
| Solution | Steady-state emission scan before bleaching | 287                          | 3                        |                              | 1                      | 356                         |
| Solution | Steady-state emission scan after bleaching  | 287                          | 3                        |                              | 1                      | 335                         |
| Solution | Lifetime                                    | 273                          | 11                       | 356                          | 5                      |                             |
| Powder   | Lifetime                                    | 273                          | 11                       | 364                          | 1                      |                             |
| Solution | Quantum yield                               | 278                          | 1                        | 300-700                      | 1                      |                             |
| Solution | Kinetic scan                                | 287                          | 15                       | 356                          | 0,5                    |                             |
| Solution | Lifetime before/after bleaching             | 280                          | 11                       | 356                          | 5                      |                             |

**Table S5.** Experimental conditions of all steady state measurements of Me<sub>2</sub>btaH.

|          | <b>Measurement</b>                             | <b>λ<sub>Exc.</sub><br/>(nm)</b> | <b>Excitation<br/>bandpass<br/>(nm)</b> | <b>λ<sub>E<sub>mi.</sub></sub><br/>(nm)</b> | <b>Emission<br/>Bandpass (nm)</b> | <b>λ<sub>MAX</sub>,<br/>(nm)</b> |
|----------|------------------------------------------------|----------------------------------|-----------------------------------------|---------------------------------------------|-----------------------------------|----------------------------------|
| Solution | Steady-state excitation scan                   |                                  | 1                                       | 350                                         | 5                                 | 281,<br>290                      |
| Powder   | Steady-state excitation scan                   |                                  | 5                                       |                                             | 1                                 | 310                              |
| Solution | Steady-state emission scan                     | 260                              | 5                                       |                                             | 1                                 | 337                              |
| Solution | Steady-state emission scan<br>before bleaching | 280                              | 15                                      |                                             | 1                                 | 336                              |
| Solution | Steady-state emission scan<br>after bleaching  | 280                              | 15                                      |                                             | 1                                 | 308                              |
| Powder   | Steady-state emission scan                     | 260                              | 5                                       |                                             | 1                                 | 353                              |
| Solution | Lifetime                                       | 273                              | 11                                      | 350                                         | 10                                |                                  |
| Powder   | Lifetime                                       | 273                              | 11                                      | 350                                         | 3                                 |                                  |
| Solution | Quantum Yield                                  | 273                              | 5                                       |                                             | 1                                 |                                  |
| Solution | Kinetic scan                                   | 280                              | 15                                      | 335                                         | 3                                 |                                  |
| Solution | Lifetime before/<br>after bleaching            | 280                              | 11                                      | 335                                         | 5                                 |                                  |
